# Supplementary material
Source: HighWire-hosted journal article supplement (https://jnm.snmjournals.org/highwire/filestream/94456/field_highwire_adjunct_files/0/117341_Supplemental_Data.pdf)
Supplement: 117341_Supplemental_Data.pdf [file 117341_Supplemental_Data.pdf]

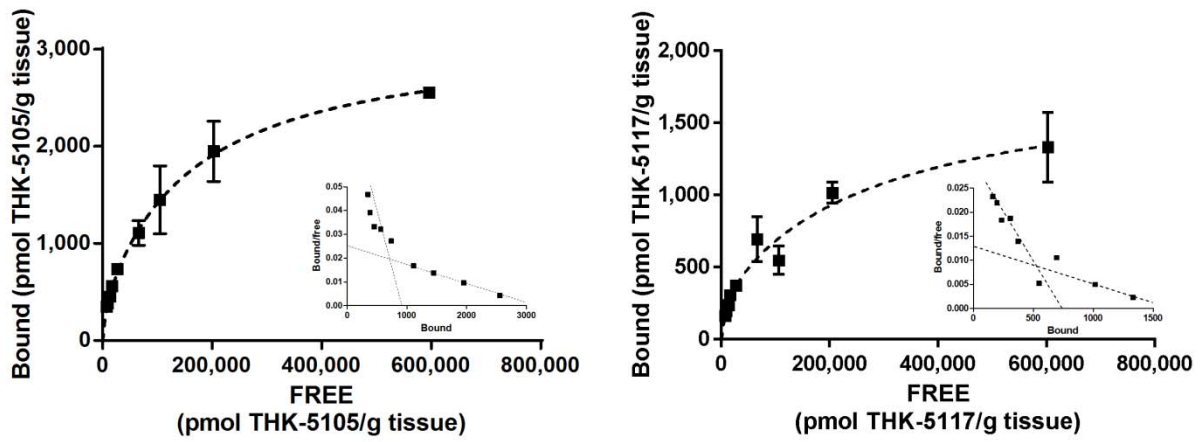

**Supplemental Figure 1:** Saturation binding curves and Scatchard plots of  $^{18}\text{F}$ -THK-5105 and  $^{18}\text{F}$ -THK-5117 for mesial temporal brain homogenates of AD patient.

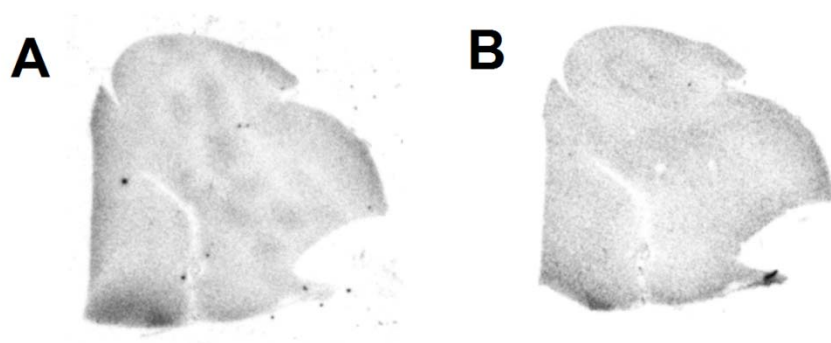

**Supplemental Figure 2:** Autoradiographic images of  $^{18}\text{F}$ -THK-5105 (**A**) and  $^{18}\text{F}$ -THK-5117 (**B**) in mesial temporal brain sections of healthy control subject (62-year-old man).

**A**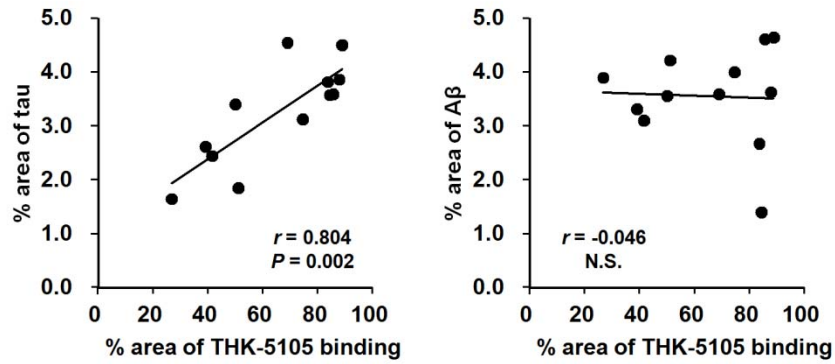**B**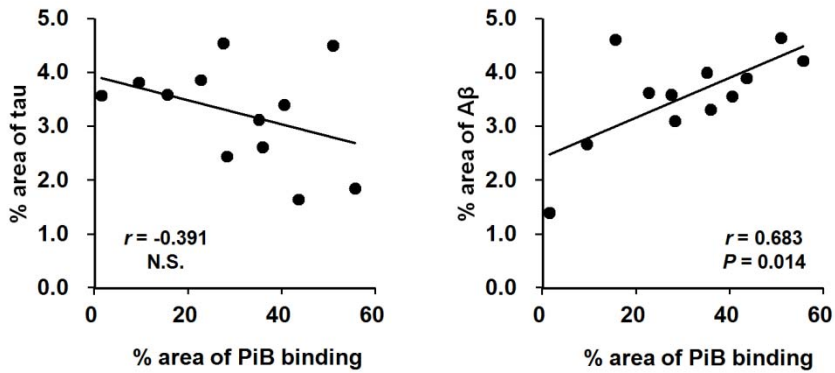

**Supplemental Figure 3:** (A) Correlational analysis of % areas of  $^{18}\text{F}$ -THK-5105 binding with % areas of tau (left) and A $\beta$  (right) immunostaining. (B) Correlational analysis of % areas of [ $^{11}\text{C}$ ]PiB binding with % areas of tau (left) and A $\beta$  (right) immunostaining.
